# Supplementary material for: WWOX Regulates UV/Cold Shock-Mediated Calcium Influx and Nuclear Bubbling in Frostbite
Source: Research Square preprint supplement (doi:10.21203/rs.3.rs-1023428/v1), 2021-11-09
Supplement: Supplementary file 1 [file 387f467bc7db2a0bb80ff2ef.pdf]

# **WWOX regulates UV/cold shock-mediated calcium influx and nuclear bubbling in frostbite**

Cheng-Chang Tsai<sup>1</sup>, Szu-Jung Chen<sup>1</sup>, Wen-Ting Deng<sup>1</sup>, Tsung-Yun Liu<sup>1</sup>, Kuan-Ting Lee<sup>1</sup>, Ming-Hui Lee<sup>1</sup>, Sing-Ru Lin<sup>1</sup>, Yu-An Chen<sup>1</sup>, Lu-Hai Wang<sup>2</sup>, Li-Jen Su<sup>3</sup>, Hamm-Ming Sheu<sup>4</sup>, and Nan-Shan Chang<sup>1,5,\*</sup>

<sup>1</sup>Institute of Molecular Medicine, College of Medicine, National Cheng Kung University, Tainan, Taiwan, ROC.

## SUPPLEMENTARY INFORMATION

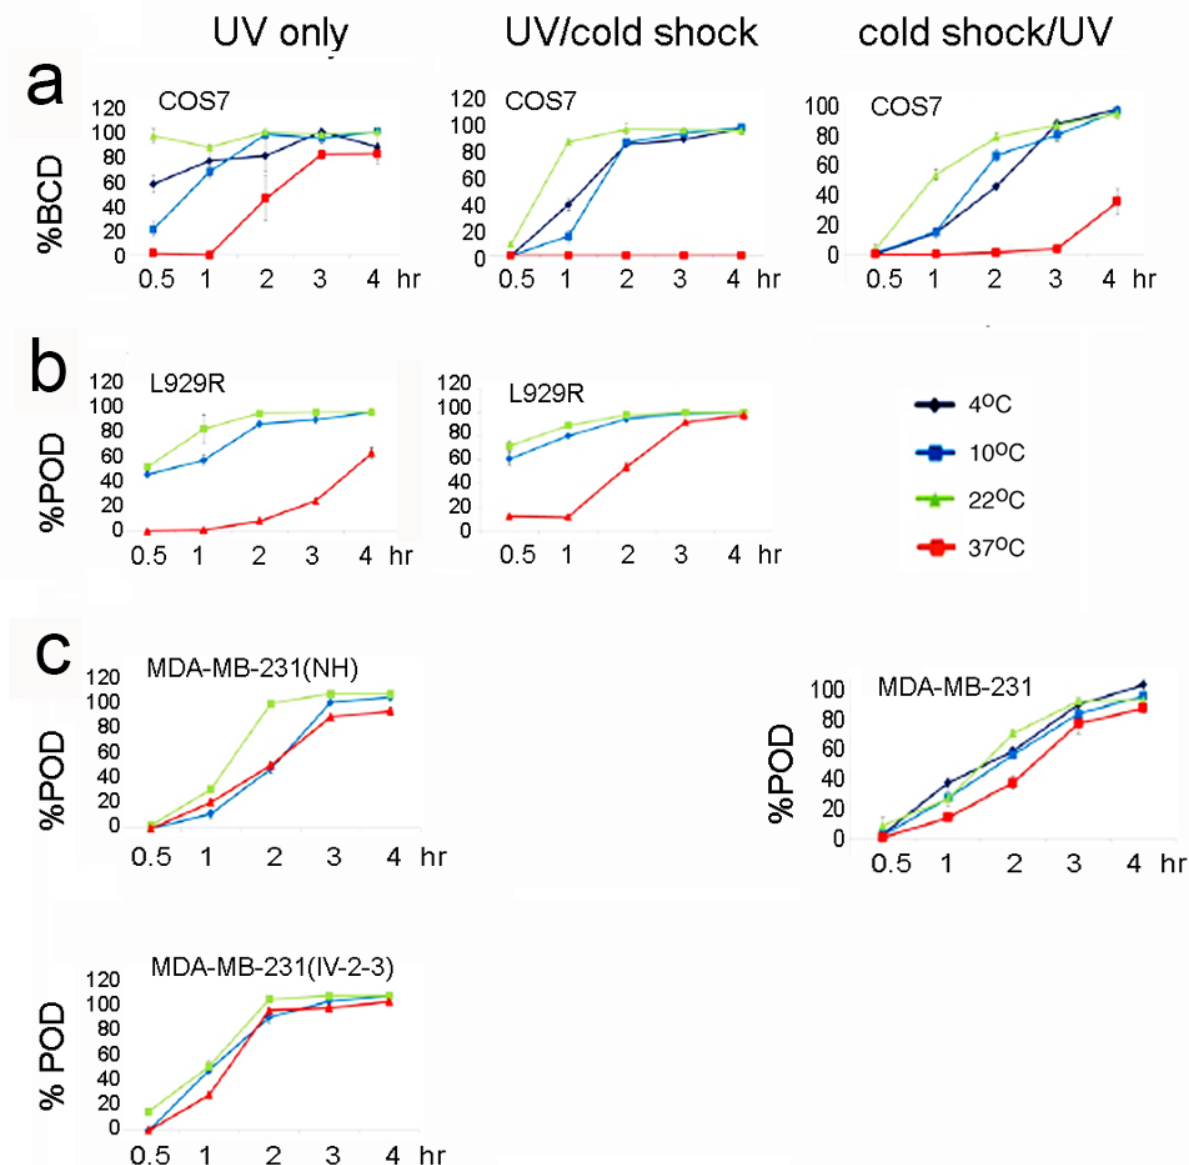

**Supplementary Figure 1. BCD: Nuclear bubbling-induced cell death.** **a** WWOXf COS7 cells were exposed to UV (480 mJoule/cm<sup>2</sup>) only, UV and then cold shock (4°C for 5 min), or cold shock and then UV. The cells were then incubated at an indicated temperature for 30 min to 4 hr. % BCD is shown (n=3). **b** Under similar conditions, WWOXd L929R cells were treated with UV only, or UV and then cold shock, followed by incubation at indicated temperatures (n=3). **c** WWOXd breast MDA-MB-231 cells were treated with UV only, or cold shock and then UV, followed by incubation at indicated temperatures (n=3).

**a**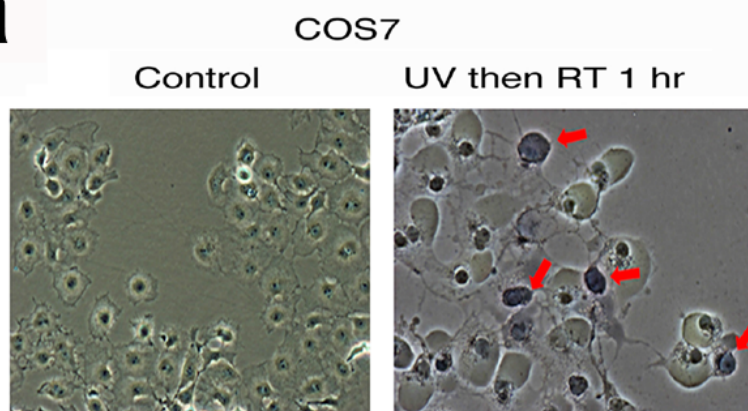**b**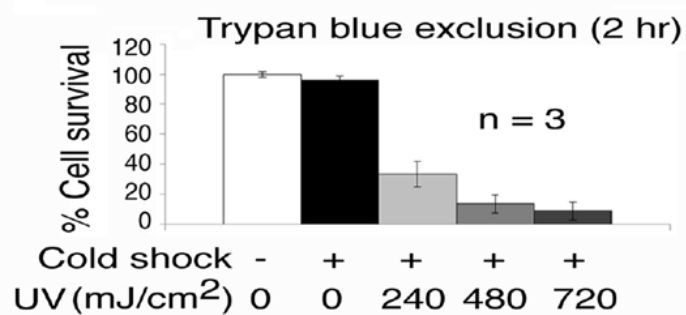**c**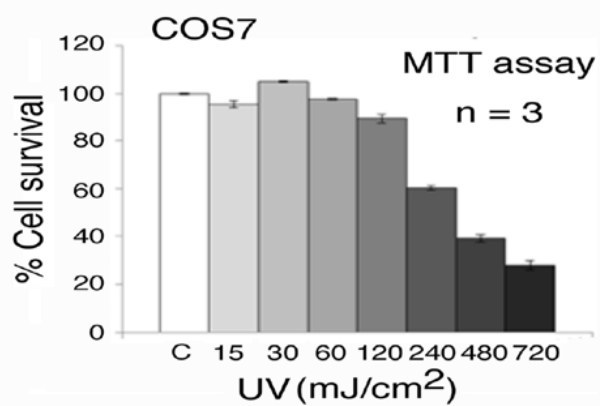**d**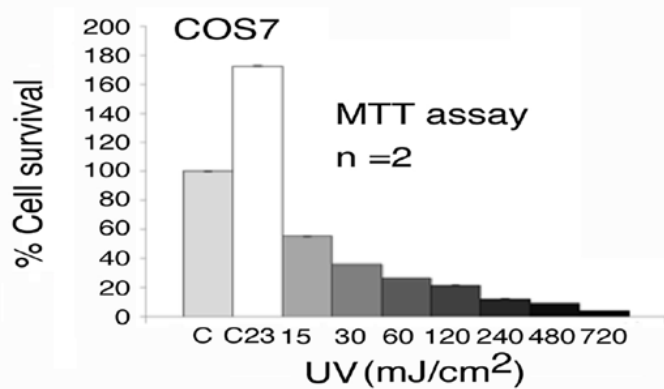

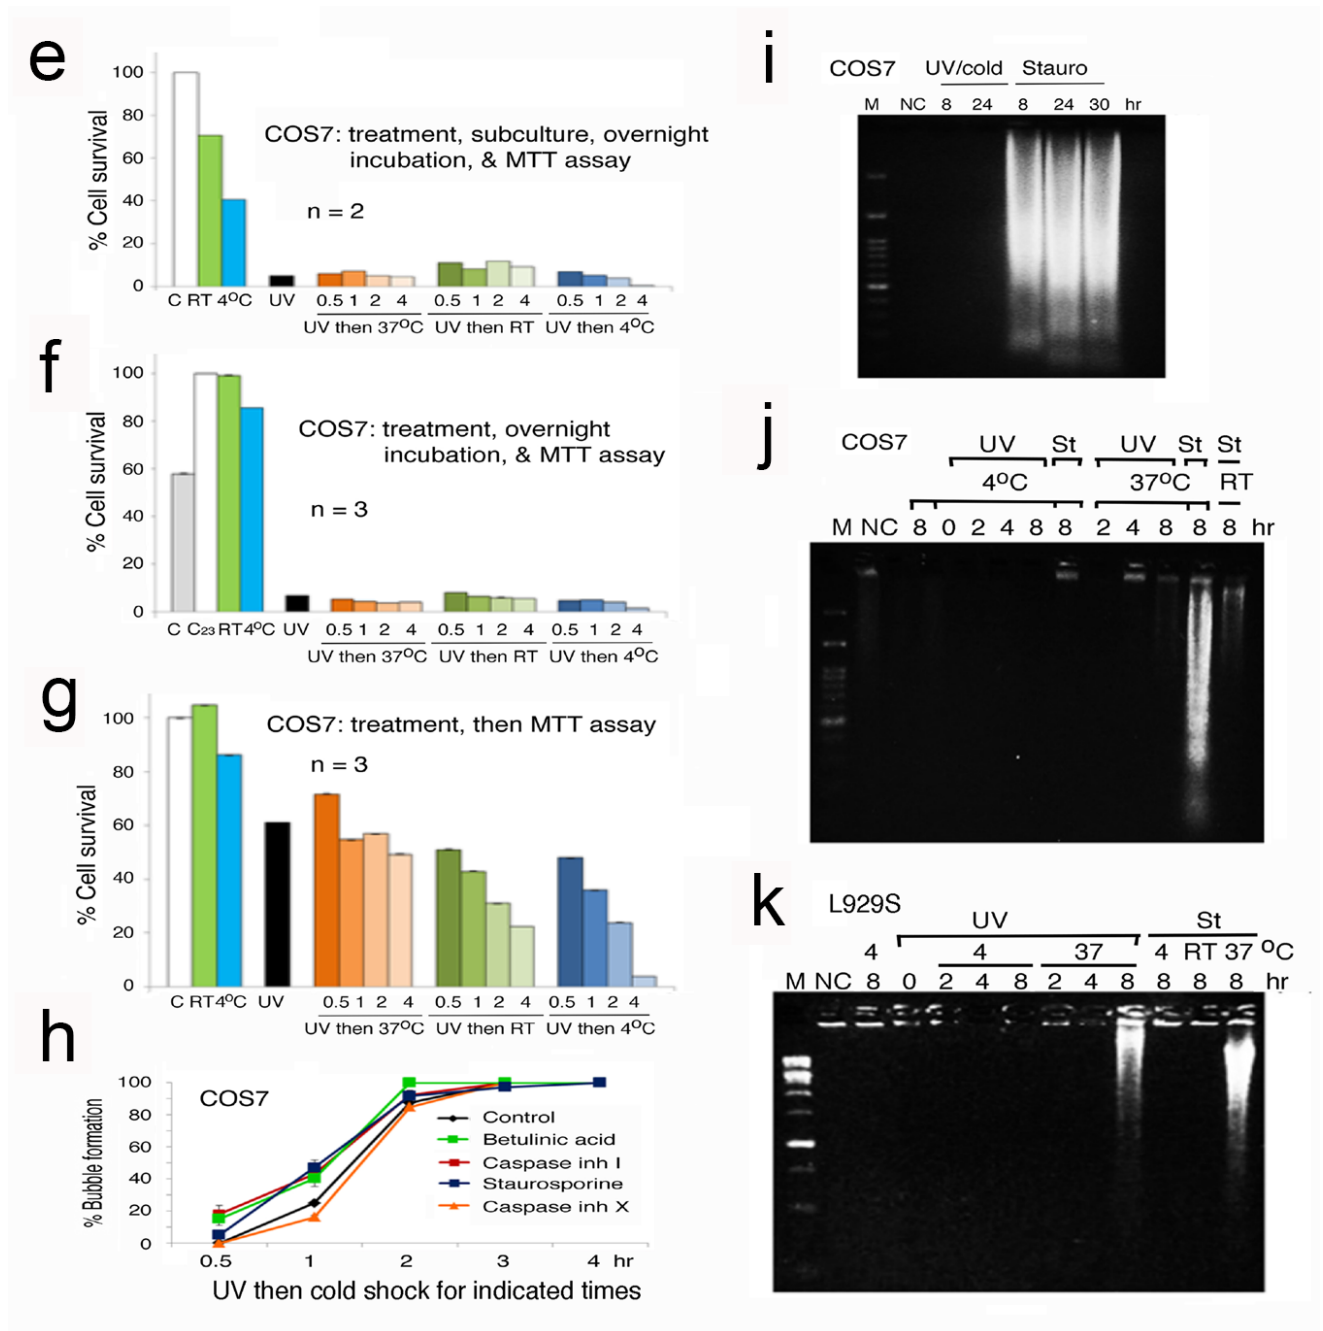

**Supplementary Figure 2. Cellular events in BCD.** **a** COS7 cells were exposed to UV irradiation (480 mJ/cm<sup>2</sup>) and then incubated at room temperature for 1 hour. Failure in trypan blue exclusion is shown in many bubbling cells (red arrows). **b** Similarly, COS7 cells were treated with UV irradiation, followed by cold shock for 5 min and then incubation at room temperature up to 2 hours (mean  $\pm$  standard deviation; n=3). **c** Immediately after UV irradiation, COS7 cells were examined for their survival by MTT assay. **d** Alternatively, UV-irradiated cells were cultured at 37°C for 23 hr, followed by MTT assay. C23 bar = cells received no UV irradiation. **e-g** COS7 cells were exposed to UV and then incubated at 4, 22, or 37°C for indicated times (hr), followed by subculture and incubation at 37°C overnight (**e**), or incubation at



37°C overnight without subculture (**f**), or without overnight incubation (**g**). The cells were subjected to MTT assays. **h** COS7 cells were treated with 10 µM of an indicated chemical for 1 hour, followed by UV and subsequent cold shock at 4°C for indicated times. **i-k** No DNA fragmentation was observed after exposure of COS7 and L929S to UV/cold shock, UV alone, or cold shock alone, and then incubation at 4°C for indicated times. When L929S cells received UV or staurosporine treatment and were then cultured at 37°C for 8 hr, these cells exhibited DNA fragmentation. Staurosporine, at 1 µM, induced DNA fragmentation at 37°C but not at room temperature. St or Stauro = Staurosporine; M = DNA markers; NC = non-treated controls.

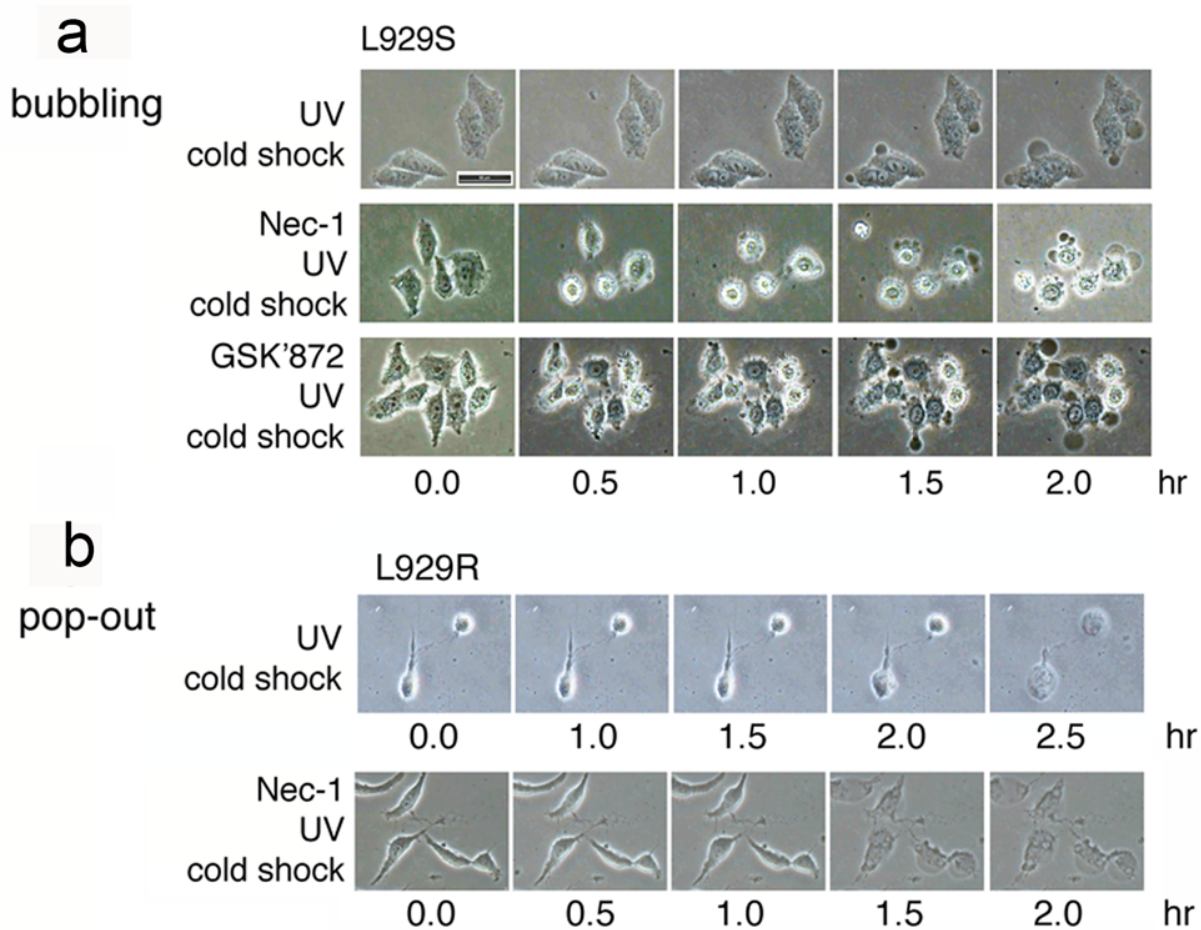

**Supplementary Figure 3. Necroptosis inhibitors cannot block BCD in L929S and POD in L929R cells.** **a** L929S cells were pretreated with Nec-1 or GSK'72 (30  $\mu$ M for 60 min), followed by exposure to UV (480 mJoule/cm<sup>2</sup>). GSK'872 reduced the time for the first appearance of nuclear bubbling by 1 hour in L929S cells. **b** Similarly, L929R cells were pretreated with Nec-1, followed by exposure to UV (480 mJoule/cm<sup>2</sup>). Nec-1 reduced the time for the first appearance of pop-out explosion by 1 hour in L929R cells.

## SCC15

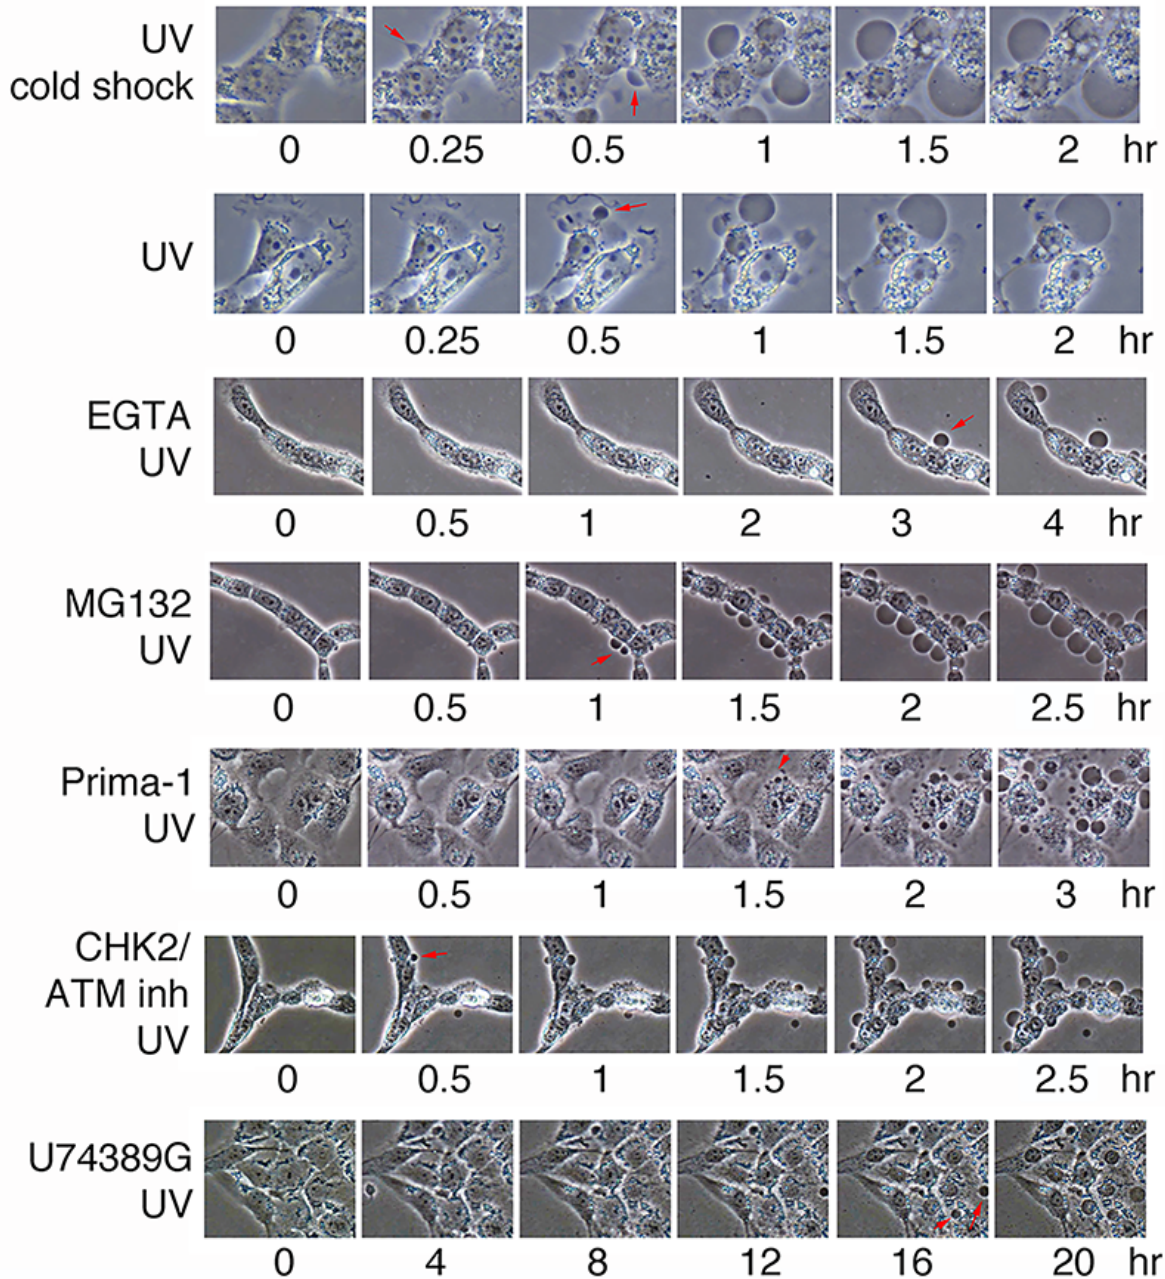

**Supplementary Figure 4. U74389G dramatically suppresses BCD at room temperature.** SCC15 cells were pretreated with EGTA (1 mM), MG132 (30  $\mu$ M), Prima-1 (30  $\mu$ M), CHK2/ATM inhibitor (30  $\mu$ M), or U743890 (30  $\mu$ M) for 30 min. The cells were then subjected to UV irradiation (480 mJoule/cm<sup>2</sup>) or UV/cold shock (5 min at 4°C), followed by examining bubbling by time-lapse microscopy at room temperature. The red arrow indicates the time needed for the first bubble to show up.



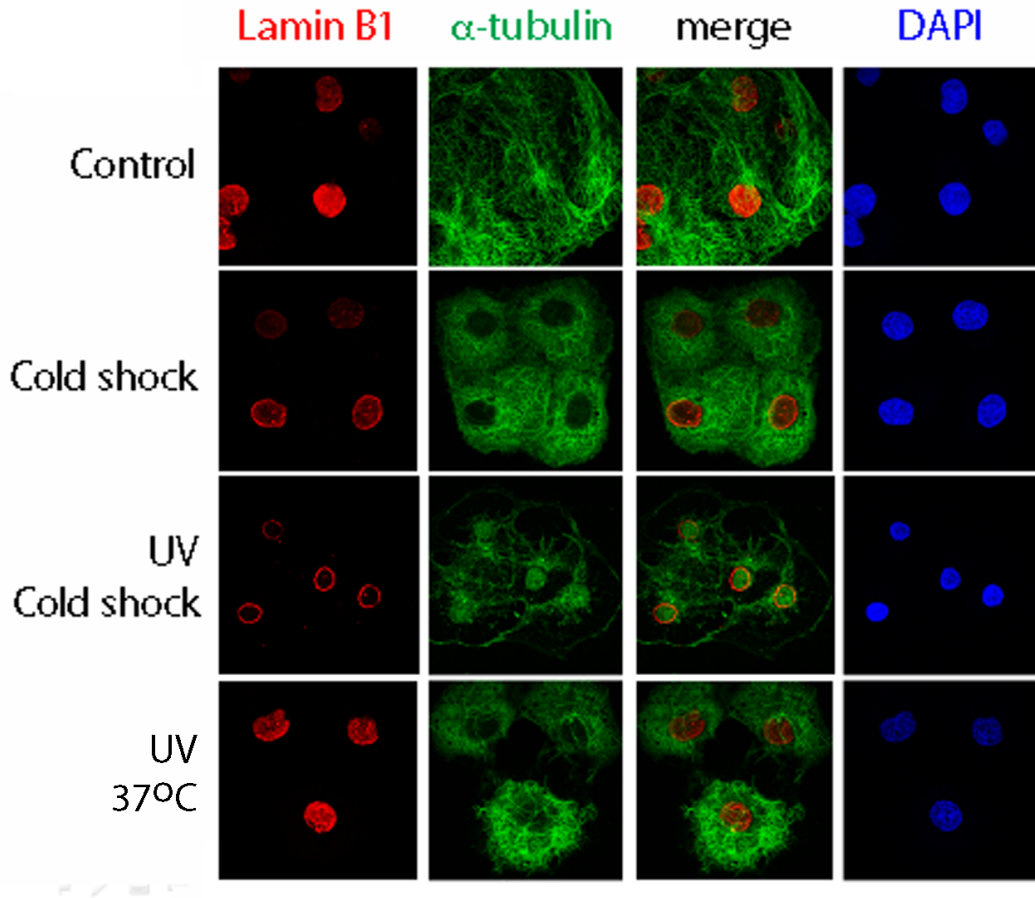

**Supplementary Figure 6. Post UV/cold shock,  $\alpha$ -tubulin is downregulated during continuous culture at 4°C, or is remodeled or conformationally altered during culture at 37°C.** COS7 cells were treated with UV (480 mJ/cm<sup>2</sup>) and then cultured at 4 or 37°C for 90 min. Cells were stained with lamin B1 and  $\alpha$ -tubulin for confocal imaging (magnification: 1000X). During subsequent culture at 37°C, the cells underwent apoptosis. The filamentary structure of  $\alpha$ -tubulin was remodeled. At 4°C, the cells underwent BCD.

# UV480 only Functional Annotation

## Down regulation

| Rank | Term                                                                  | Count | PValue  | FDR     |
|------|-----------------------------------------------------------------------|-------|---------|---------|
| 1    | GO:0006397~mRNA processing                                            | 19    | 1.3E-08 | 2.0E-05 |
| 2    | GO:0016071~mRNA metabolic process                                     | 20    | 2.1E-08 | 3.3E-05 |
| 3    | GO:0008380~RNA splicing                                               | 16    | 7.5E-08 | 1.2E-04 |
| 4    | GO:0051603~proteolysis involved in cellular protein catabolic process | 24    | 6.7E-07 | 1.1E-03 |
| 5    | GO:0044257~cellular protein catabolic process                         | 24    | 7.4E-07 | 1.2E-03 |
| 6    | GO:0019941~modification-dependent protein catabolic process           | 23    | 1.1E-06 | 1.7E-03 |
| 7    | GO:0043632~modification-dependent macromolecule catabolic process     | 23    | 1.1E-06 | 1.7E-03 |
| 8    | GO:0030163~protein catabolic process                                  | 24    | 1.4E-06 | 2.1E-03 |
| 9    | GO:0044265~cellular macromolecule catabolic process                   | 25    | 1.8E-06 | 2.9E-03 |
| 10   | GO:0009057~macromolecule catabolic process                            | 25    | 6.2E-06 | 9.9E-03 |
| 11   | GO:0006396~RNA processing                                             | 19    | 2.2E-05 | 3.4E-02 |
| 12   | GO:0010608~posttranscriptional regulation of gene expression          | 10    | 1.6E-04 | 2.6E-01 |
| 13   | GO:0006325~chromatin organization                                     | 14    | 3.1E-04 | 4.8E-01 |
| 14   | GO:0016568~chromatin modification                                     | 12    | 3.2E-04 | 5.1E-01 |
| 15   | GO:0051276~chromosome organization                                    | 16    | 3.3E-04 | 5.3E-01 |
| 16   | GO:0006417~regulation of translation                                  | 8     | 3.7E-04 | 5.9E-01 |
| 17   | GO:0006508~proteolysis                                                | 28    | 5.6E-04 | 8.8E-01 |

## Up regulation

| Rank | Term                                                            | Count | PValue  | FDR     |
|------|-----------------------------------------------------------------|-------|---------|---------|
| 1    | GO:0006412~translation                                          | 19    | 1.6E-11 | 2.2E-08 |
| 2    | GO:0007608~sensory perception of smell                          | 25    | 1.3E-06 | 1.8E-03 |
| 3    | GO:0007606~sensory perception of chemical stimulus              | 25    | 4.1E-06 | 5.6E-03 |
| 4    | GO:0007186~G-protein coupled receptor protein signaling pathway | 30    | 5.6E-05 | 7.8E-02 |
| 5    | GO:0007600~sensory perception                                   | 25    | 6.1E-05 | 8.4E-02 |
| 6    | GO:0050890~cognition                                            | 25    | 1.4E-04 | 2.0E-01 |
| 7    | GO:0050877~neurological system process                          | 26    | 3.9E-04 | 5.4E-01 |

## 4°C(30 min) Functional Annotation

### Down regulation

| Rank | Term                                                            | Count | PValue  | FDR     |
|------|-----------------------------------------------------------------|-------|---------|---------|
| 1    | GO:0007186~G-protein coupled receptor protein signaling pathway | 42    | 1.6E-08 | 2.3E-05 |
| 2    | GO:0007608~sensory perception of smell                          | 30    | 1.1E-07 | 1.6E-04 |
| 3    | GO:0007606~sensory perception of chemical stimulus              | 31    | 1.2E-07 | 1.8E-04 |
| 4    | GO:0007600~sensory perception                                   | 32    | 1.2E-06 | 1.8E-03 |
| 5    | GO:0050890~cognition                                            | 32    | 3.9E-06 | 5.7E-03 |
| 6    | GO:0007166~cell surface receptor linked signal transduction     | 43    | 1.3E-05 | 1.9E-02 |
| 7    | GO:0050877~neurological system process                          | 32    | 5.0E-05 | 7.3E-02 |

### Up regulation

| Rank | Term                                                            | Count | PValue  | FDR     |
|------|-----------------------------------------------------------------|-------|---------|---------|
| 1    | GO:0007606~sensory perception of chemical stimulus              | 22    | 1.1E-02 | 1.6E+01 |
| 2    | GO:0050877~neurological system process                          | 28    | 1.3E-02 | 1.8E+01 |
| 3    | GO:0006007~glucose catabolic process                            | 4     | 1.7E-02 | 2.3E+01 |
| 4    | GO:0019320~hexose catabolic process                             | 4     | 1.7E-02 | 2.3E+01 |
| 5    | GO:0046365~monosaccharide catabolic process                     | 4     | 1.8E-02 | 2.5E+01 |
| 6    | GO:0007608~sensory perception of smell                          | 20    | 2.2E-02 | 2.9E+01 |
| 7    | GO:0044275~cellular carbohydrate catabolic process              | 4     | 2.4E-02 | 3.1E+01 |
| 8    | GO:0046164~alcohol catabolic process                            | 4     | 3.0E-02 | 3.7E+01 |
| 9    | GO:0007600~sensory perception                                   | 23    | 3.2E-02 | 3.9E+01 |
| 10   | GO:0043933~macromolecular complex subunit organization          | 9     | 3.7E-02 | 4.4E+01 |
| 11   | GO:0050708~regulation of protein secretion                      | 3     | 3.8E-02 | 4.5E+01 |
| 12   | GO:0006334~nucleosome assembly                                  | 4     | 4.0E-02 | 4.6E+01 |
| 13   | GO:0034621~cellular macromolecular complex subunit organization | 7     | 4.2E-02 | 4.8E+01 |
| 14   | GO:0031497~chromatin assembly                                   | 4     | 4.3E-02 | 4.9E+01 |
| 15   | GO:0034728~nucleosome organization                              | 4     | 4.4E-02 | 5.0E+01 |

# UV480 mJ/cm<sup>2</sup> + 4°C(30min)

## Functional Annotation

### Down regulation

| Rank | Term                                                                  | Count | PValue  | FDR     |
|------|-----------------------------------------------------------------------|-------|---------|---------|
| 1    | GO:0006397~mRNA processing                                            | 19    | 4.9E-08 | 7.9E-05 |
| 2    | GO:0016071~mRNA metabolic process                                     | 20    | 8.2E-08 | 1.3E-04 |
| 3    | GO:0008380~RNA splicing                                               | 16    | 2.3E-07 | 3.7E-04 |
| 4    | GO:0051603~proteolysis involved in cellular protein catabolic process | 23    | 1.0E-05 | 1.6E-02 |
| 5    | GO:0044257~cellular protein catabolic process                         | 23    | 1.1E-05 | 1.8E-02 |
| 6    | GO:0043632~modification-dependent macromolecule catabolic process     | 22    | 1.5E-05 | 2.5E-02 |
| 7    | GO:0019941~modification-dependent protein catabolic process           | 22    | 1.5E-05 | 2.5E-02 |
| 8    | GO:0030163~protein catabolic process                                  | 23    | 1.9E-05 | 3.0E-02 |
| 9    | GO:0044265~cellular macromolecule catabolic process                   | 24    | 2.5E-05 | 4.1E-02 |
| 10   | GO:0010608~posttranscriptional regulation of gene expression          | 11    | 5.9E-05 | 9.5E-02 |
| 11   | GO:0006396~RNA processing                                             | 19    | 6.7E-05 | 1.1E-01 |
| 12   | GO:0009057~macromolecule catabolic process                            | 24    | 7.5E-05 | 1.2E-01 |
| 13   | GO:0034622~cellular macromolecular complex assembly                   | 13    | 7.7E-05 | 1.2E-01 |
| 14   | GO:0006417~regulation of translation                                  | 9     | 1.0E-04 | 1.6E-01 |
| 15   | GO:0034621~cellular macromolecular complex subunit organization       | 13    | 2.4E-04 | 3.9E-01 |



# UV480 mJ/cm<sup>2</sup> + 4°C(30min)

## Functional Annotation

### Up regulation

| Rank | Term                                                            | Count | PValue  | FDR     |
|------|-----------------------------------------------------------------|-------|---------|---------|
| 1    | GO:0007608~sensory perception of smell                          | 25    | 2.0E-07 | 2.8E-04 |
| 2    | GO:0007606~sensory perception of chemical stimulus              | 25    | 6.6E-07 | 9.1E-04 |
| 3    | GO:0007186~G-protein coupled receptor protein signaling pathway | 32    | 7.6E-07 | 1.0E-03 |
| 4    | GO:0006412~translation                                          | 13    | 1.4E-06 | 1.9E-03 |
| 5    | GO:0007600~sensory perception                                   | 25    | 1.1E-05 | 1.6E-02 |
| 6    | GO:0050890~cognition                                            | 25    | 2.8E-05 | 3.9E-02 |
| 7    | GO:0007166~cell surface receptor linked signal transduction     | 33    | 1.0E-04 | 1.4E-01 |
| 8    | GO:0050877~neurological system process                          | 25    | 2.1E-04 | 2.9E-01 |

**Supplementary Figure 7. Gene expression profiles of L929S cells upon exposure to UV (480 mJoule/cm<sup>2</sup>) and/or cold shock at 4°C for 30 min. 6 Gene chips from Affymetrix were used.**

a

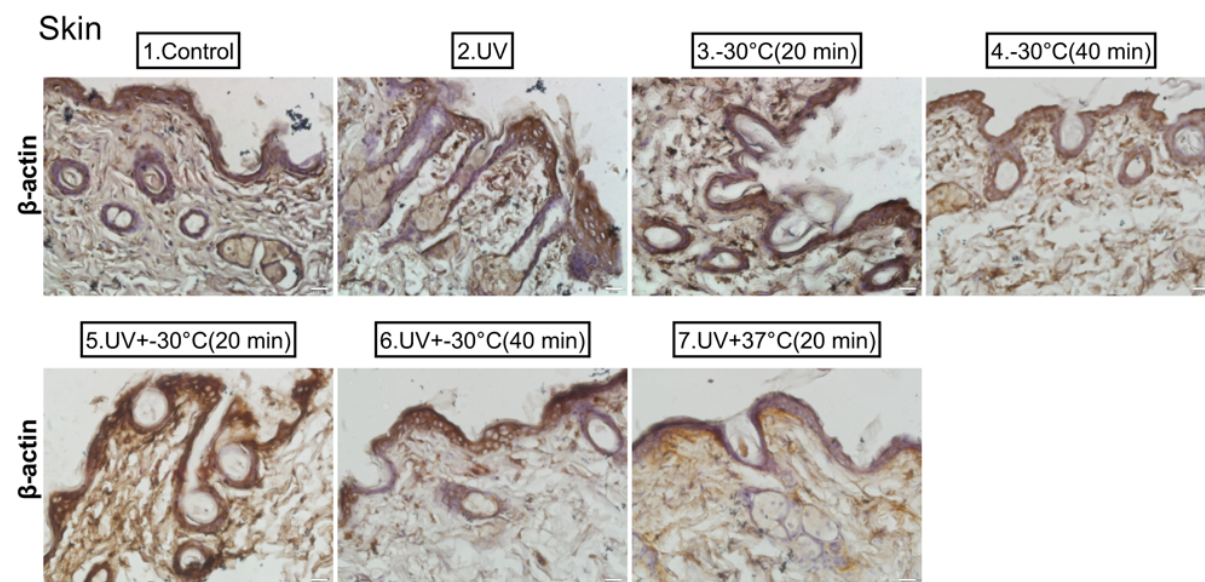

b

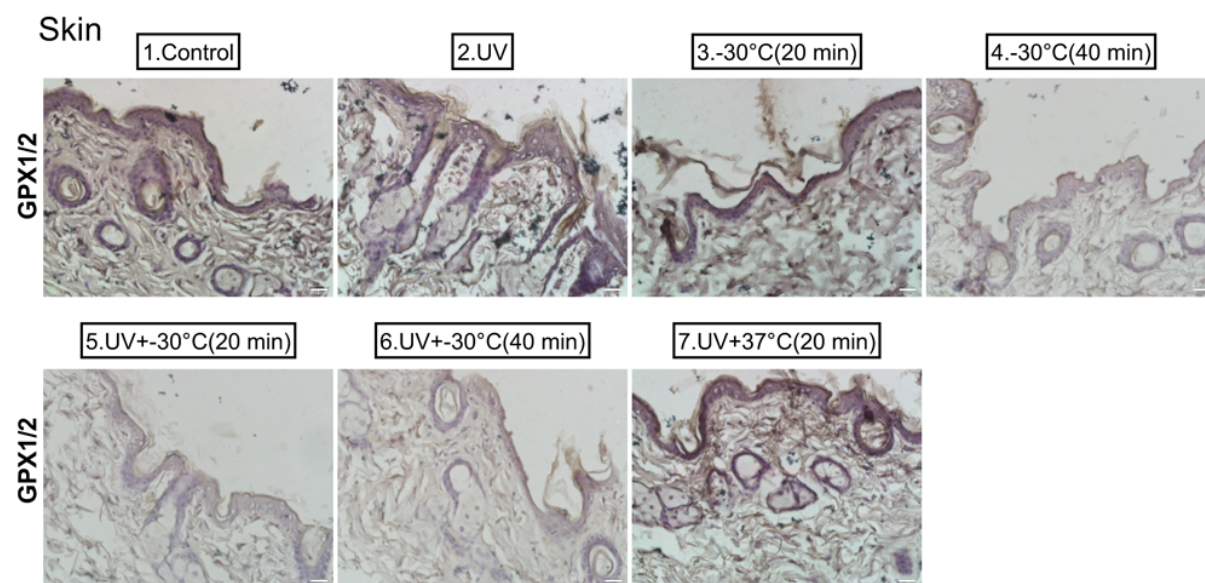

C

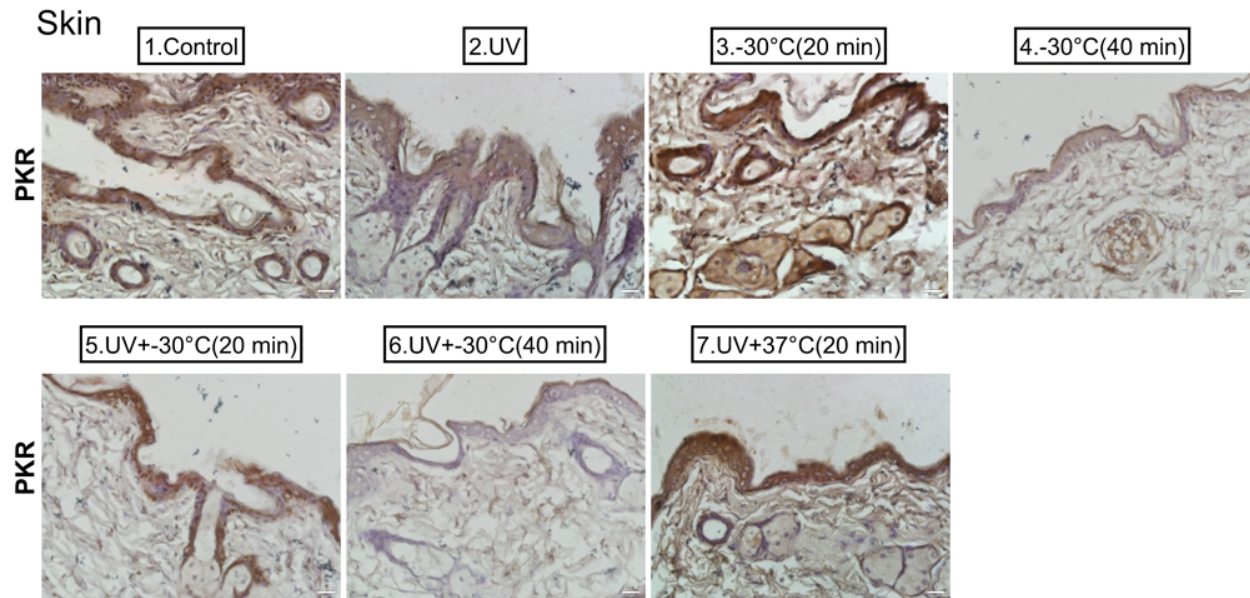

d

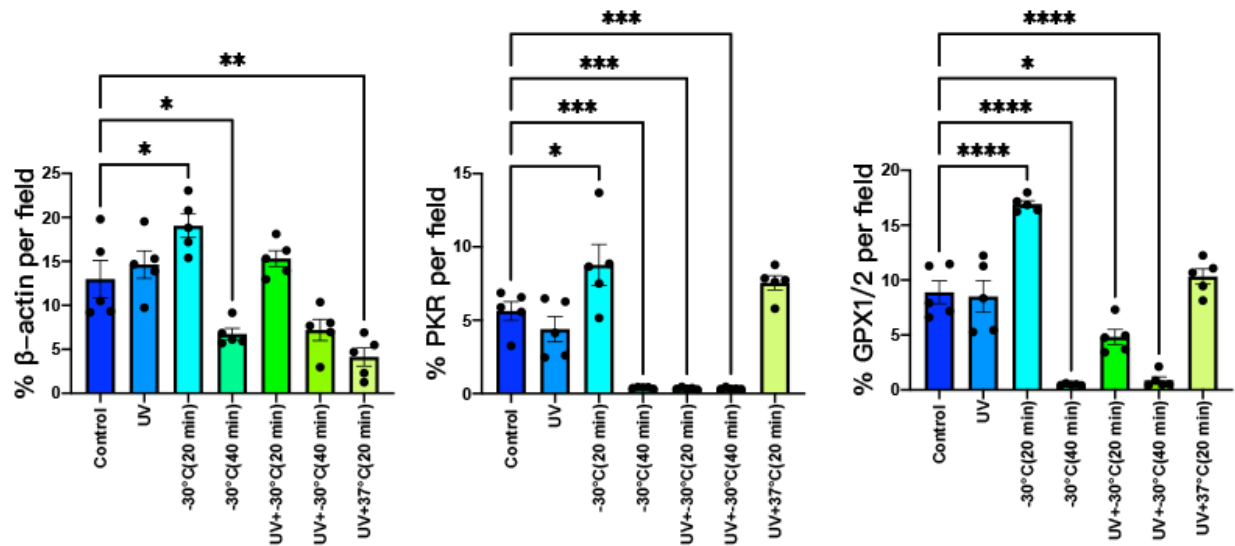

One-Way ANOVA, \*:  $p < 0.05$ , \*\*:  $p < 0.01$ , \*\*\*:  $p < 0.001$ , \*\*\*\*:  $p < 0.0001$



e

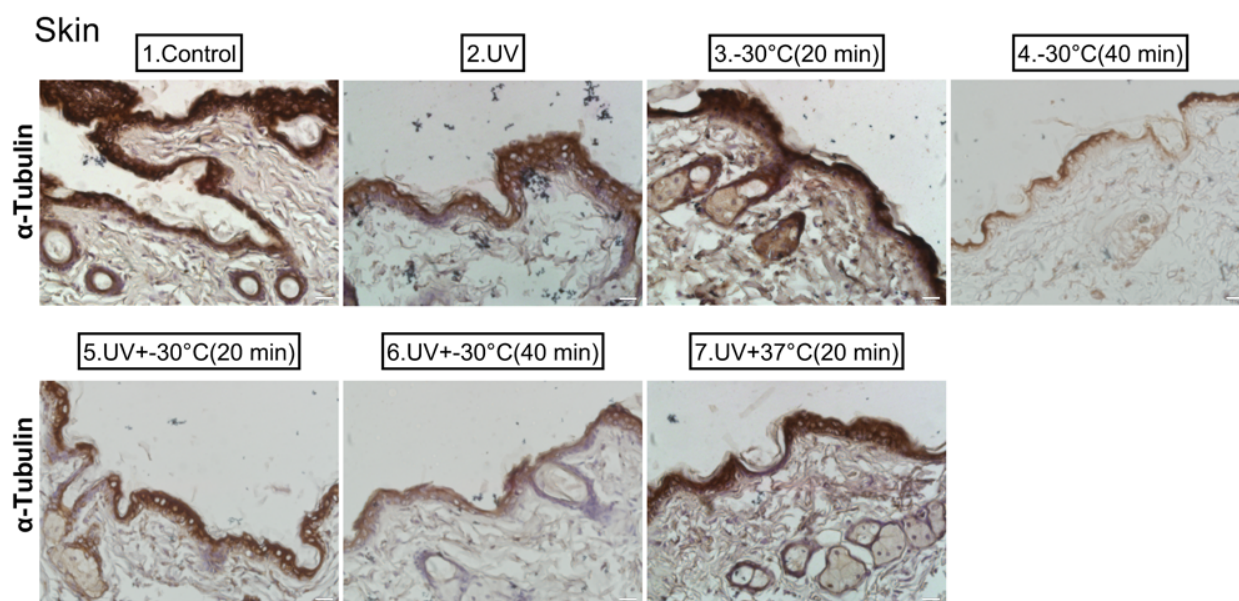

f

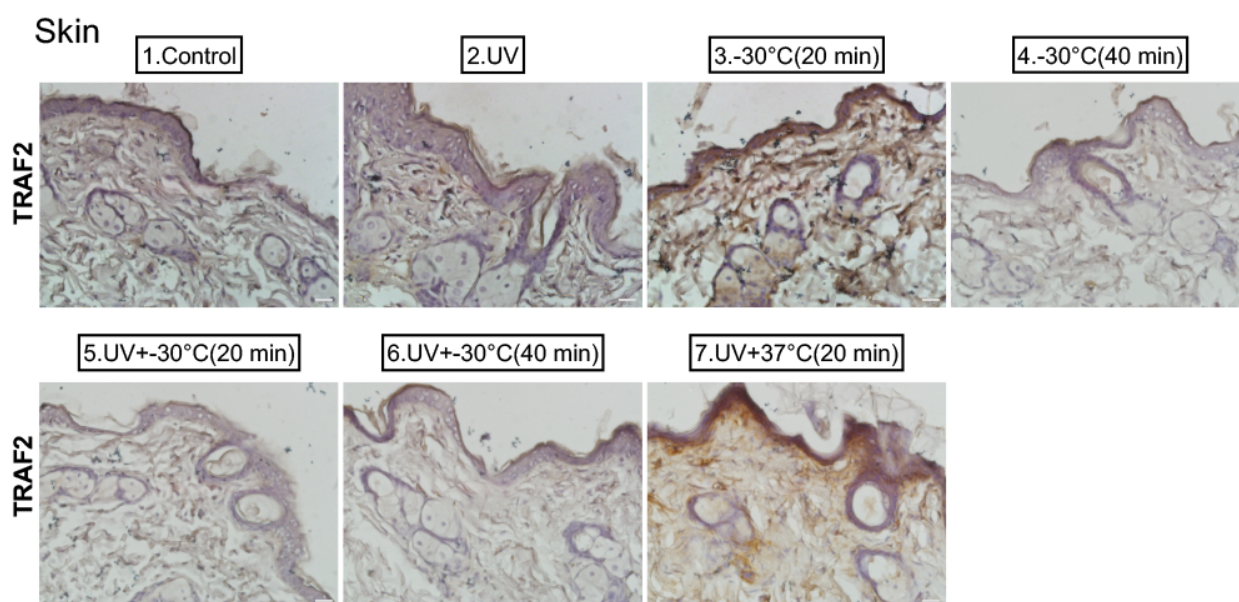

g

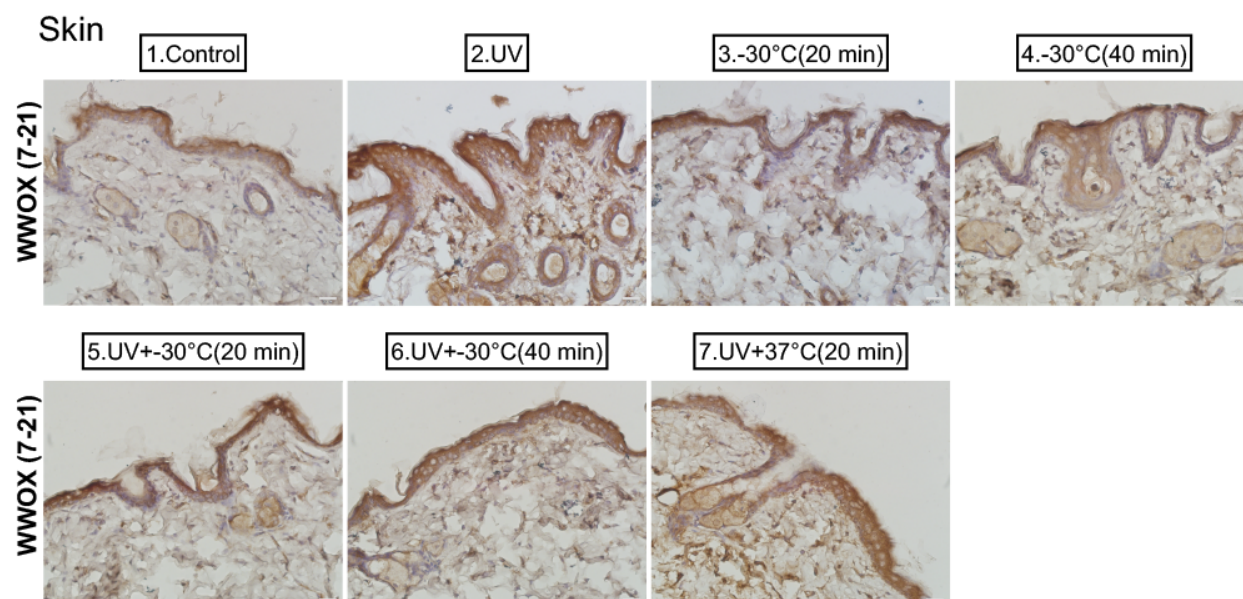

h

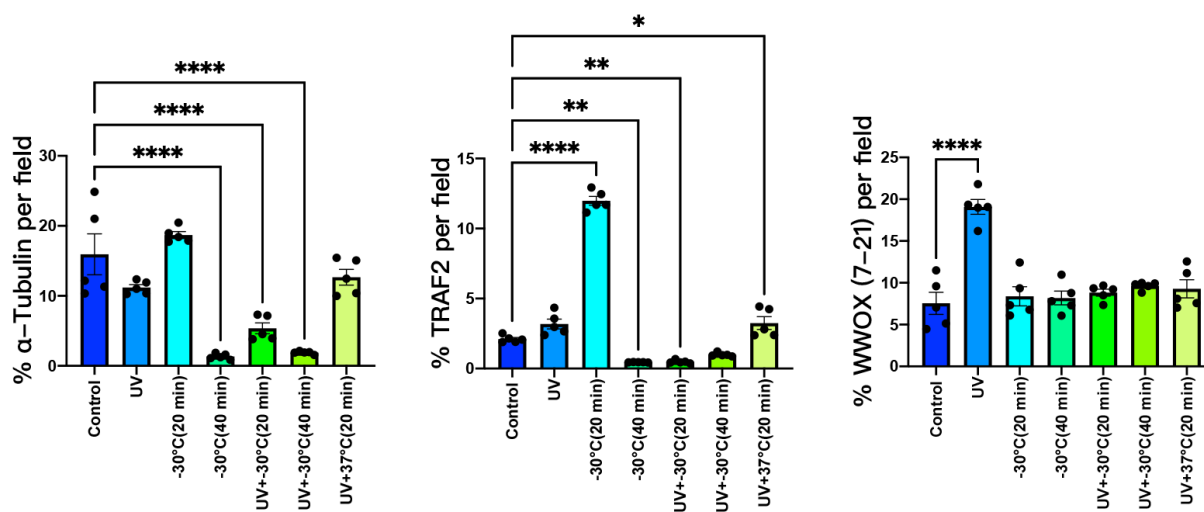

One-Way ANOVA, \*:  $p < 0.05$ , \*\*:  $p < 0.01$ , \*\*\*:  $p < 0.001$ , \*\*\*\*:  $p < 0.0001$

i

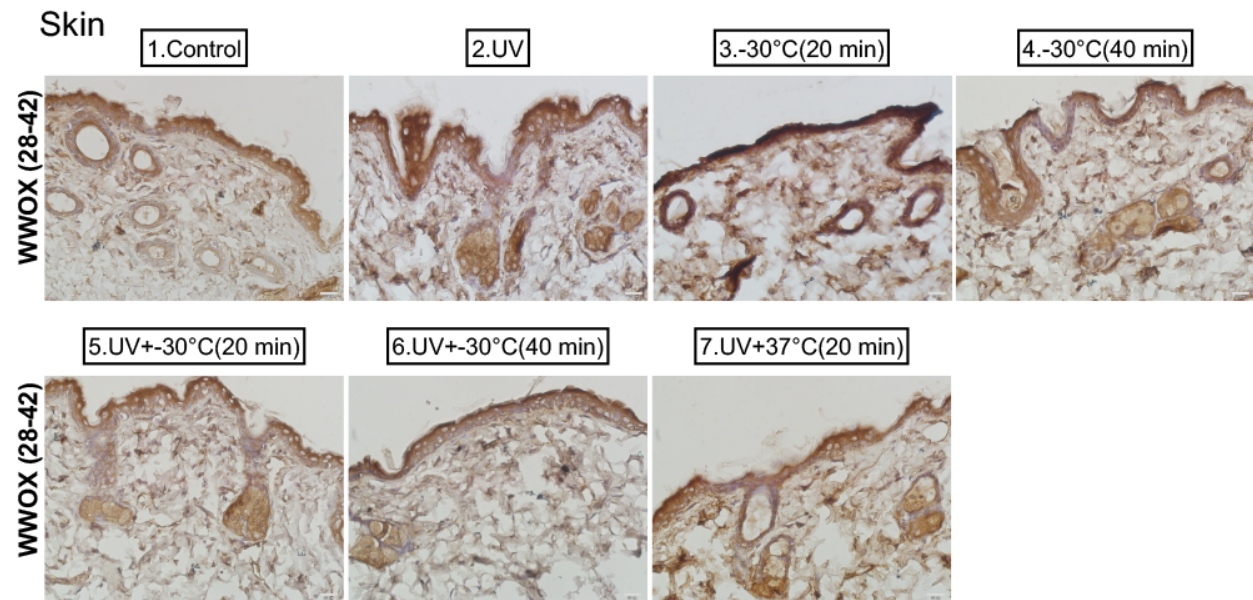

j

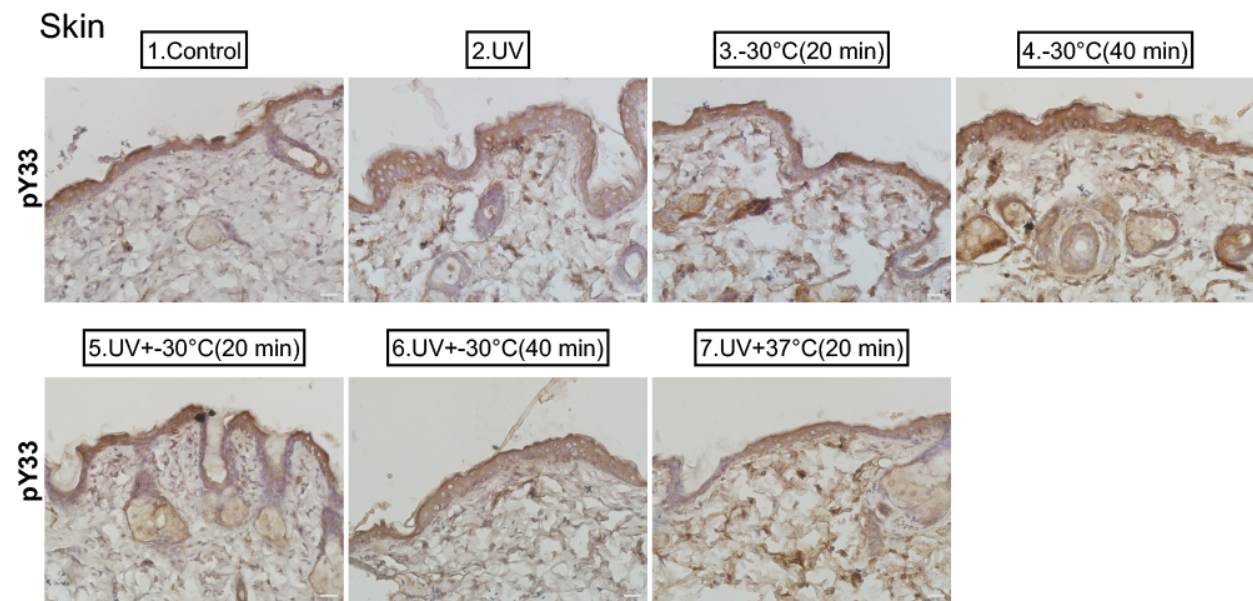



k

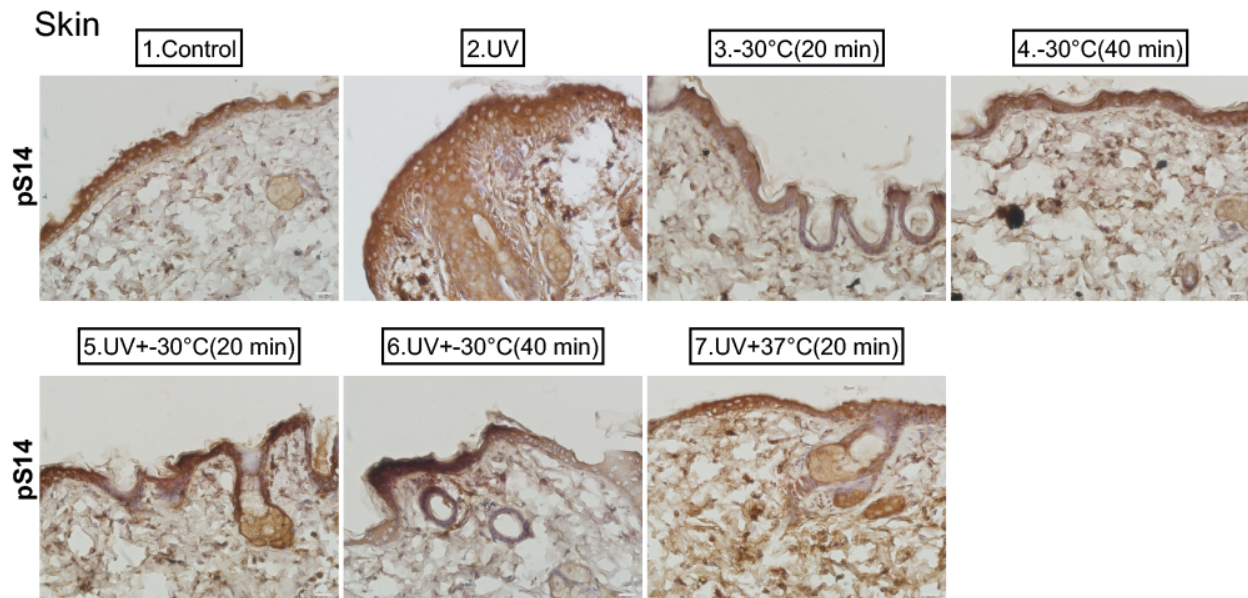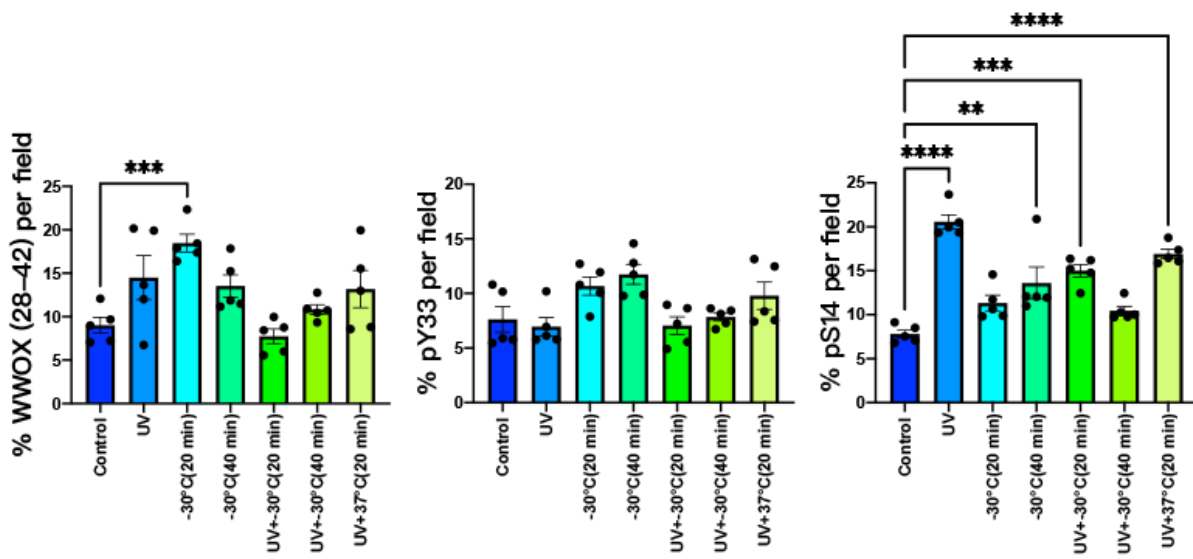

One-Way ANOVA, \*:  $p < 0.05$ , \*\*:  $p < 0.01$ , \*\*\*:  $p < 0.001$ , \*\*\*\*:  $p < 0.0001$

**Supplementary Figure 8. Protein expression in the skin of UV/cold shock-treated hairless mice. a-l** Mice were exposed to UV (960 mJoule/cm<sup>2</sup>) and/or cold shock in a -30°C cold box for 20 and 40 min, respectively. Alternatively, mice were exposed to UV and then placed in a 37°C chamber for 20 min. Post experiments, mice were sacrificed. IHC was carried to determine protein expression in the skin using specific antibodies. Antibodies against WWOX amino acid segments at 7-21 (**g**) and 28-42 (**i**) were used, respectively. One way ANOVA was used to analyze the statistical differences among all samples in each experimental group (n=5; \* $p$ <0.05; \*\* $p$ <0.01; \*\*\* $p$ <0.001; \*\*\*\* $p$ <0.0001).



a

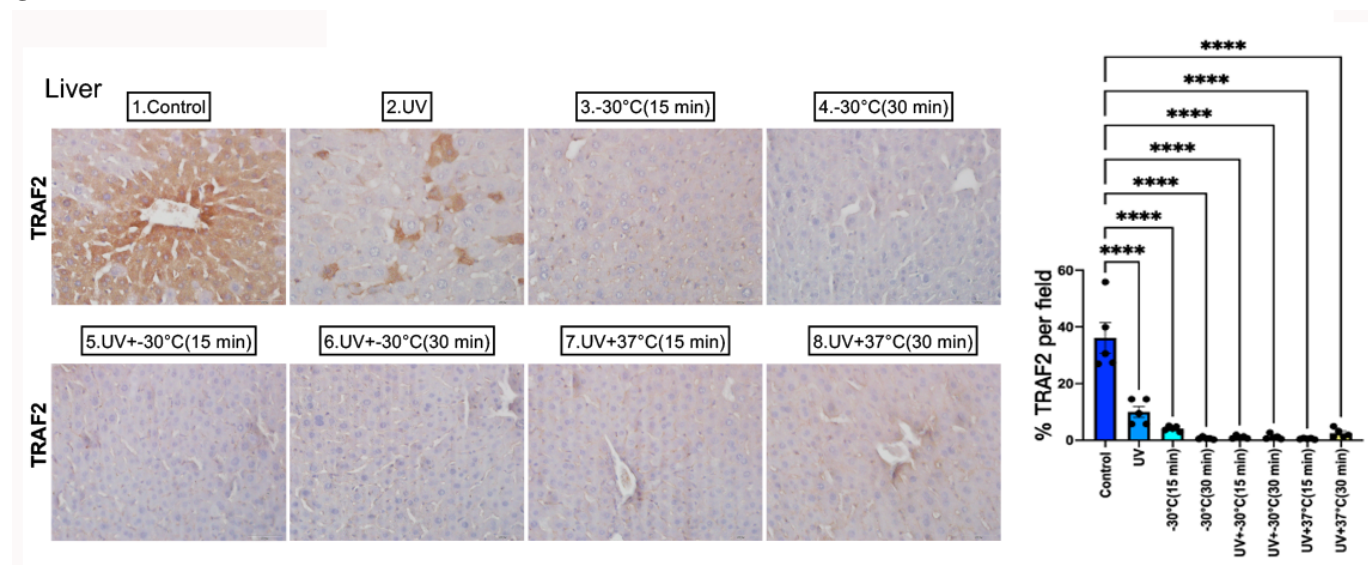

b

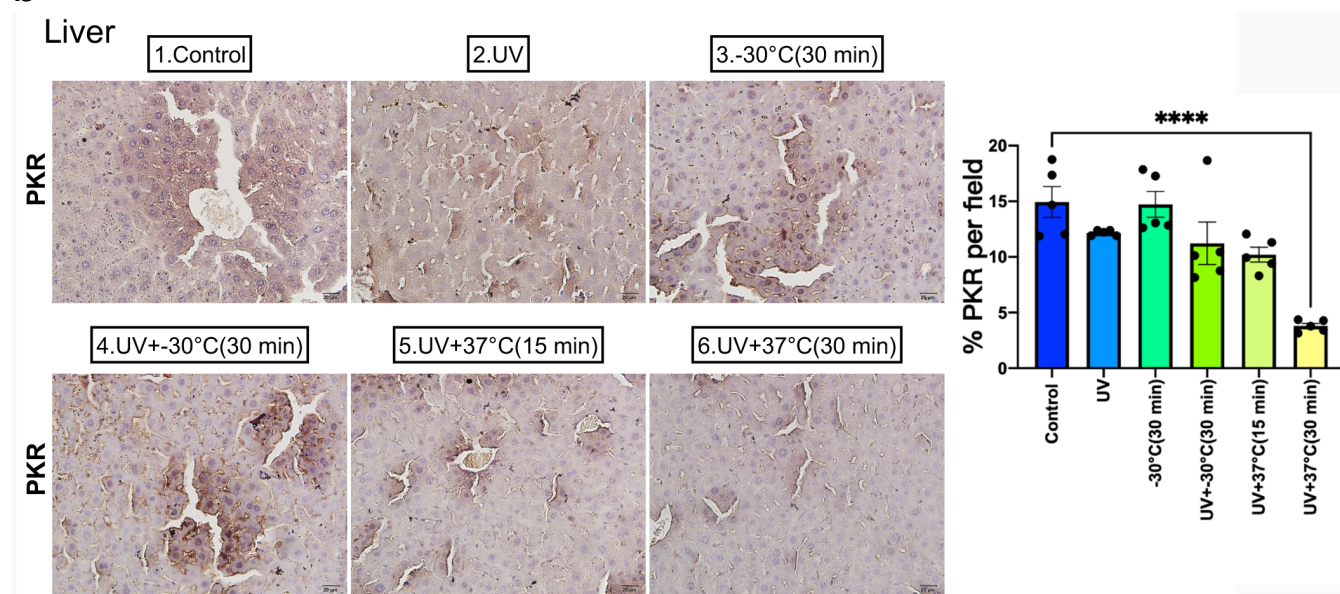

One-Way ANOVA, \*:  $p < 0.05$ , \*\*:  $p < 0.01$ , \*\*\*:  $p < 0.001$ , \*\*\*\*:  $p < 0.0001$

C

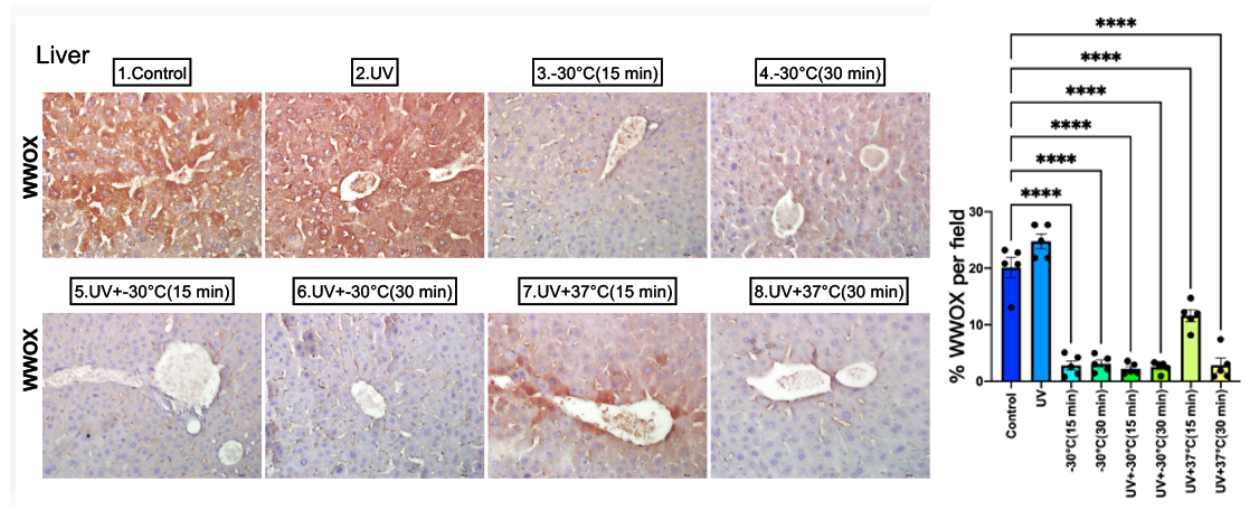

d

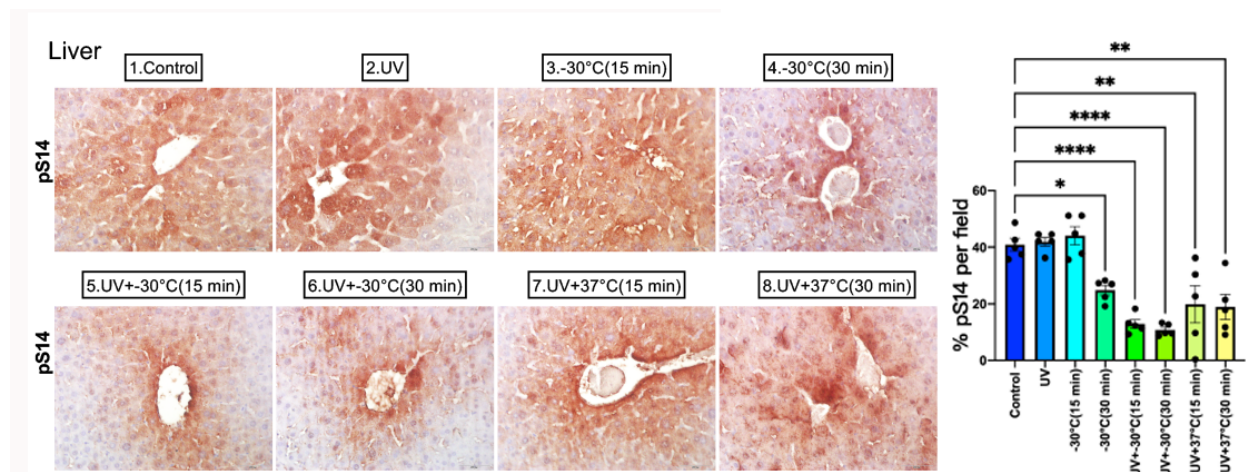

e

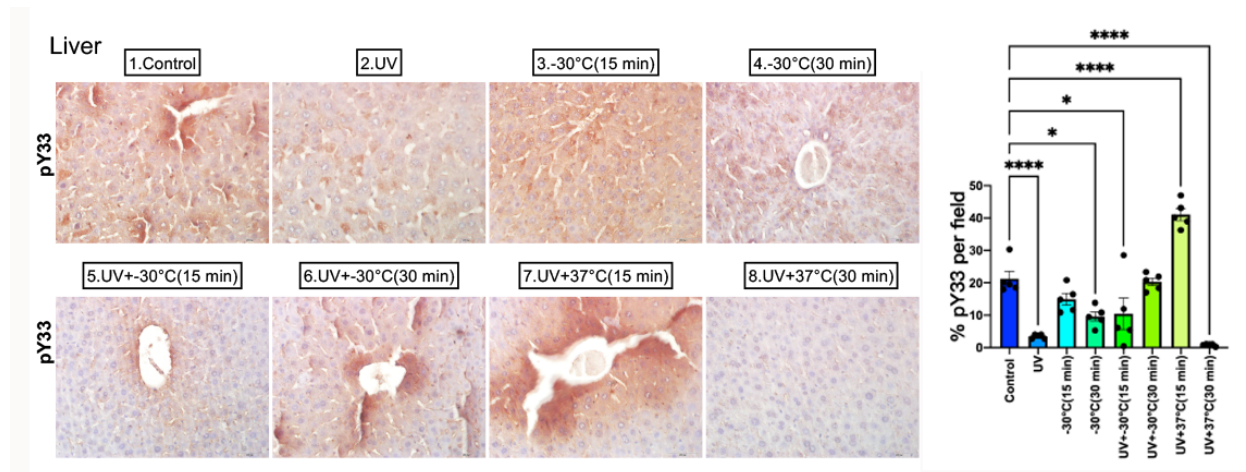



f

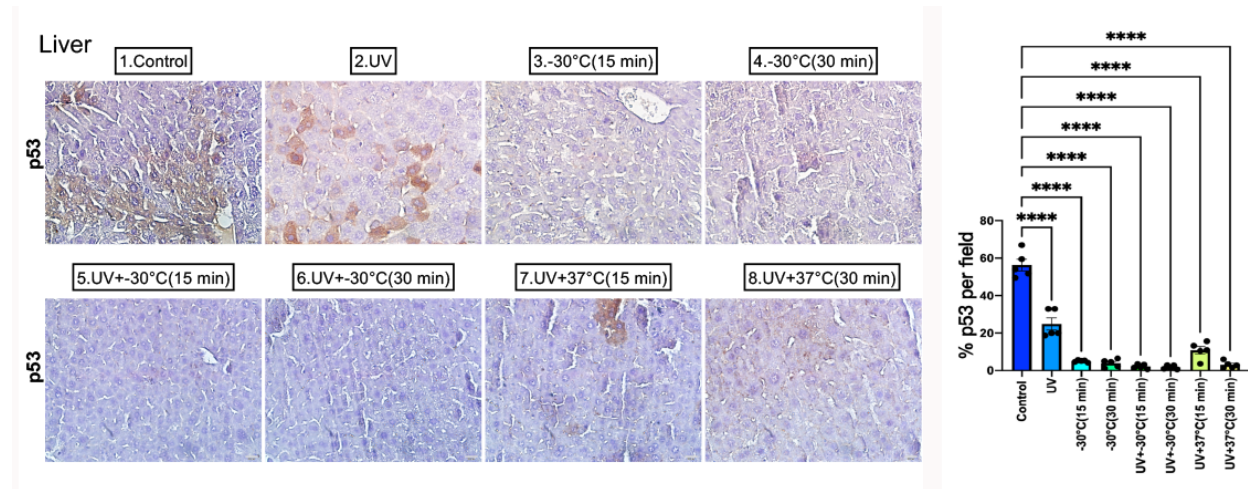

g

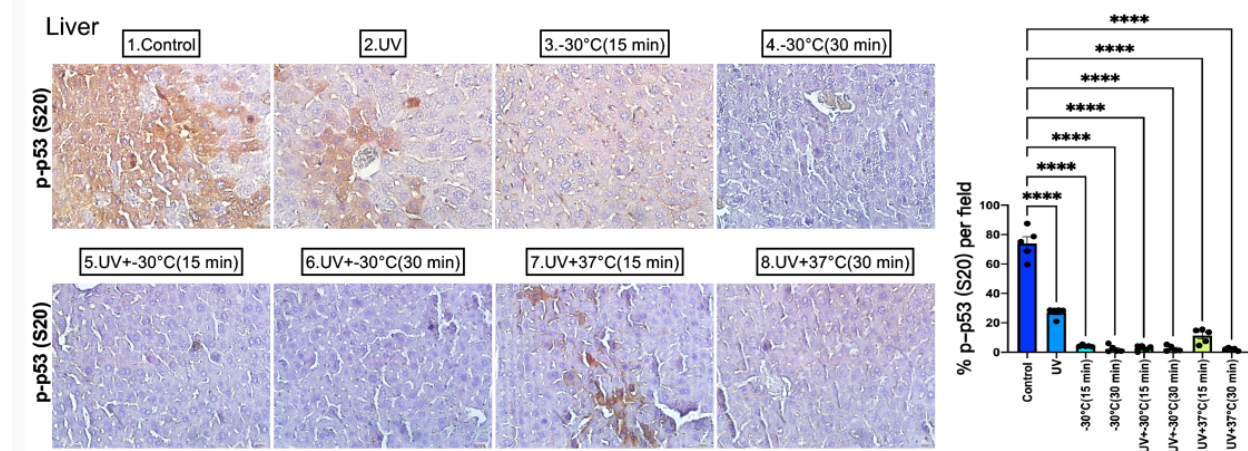

h

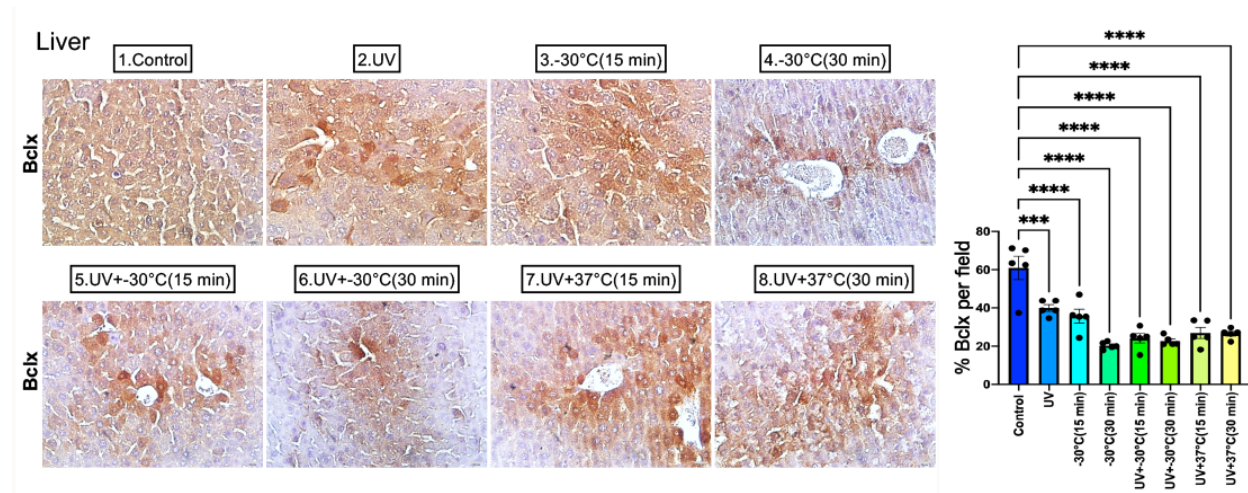

i

Liver

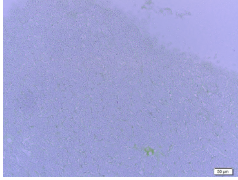

Negative control (no primary antibody)  
(40x magnification)

**Supplementary Figure 9. Protein expression in liver in UV/cold shock-treated hairless mice. a-i** Hairless mice were exposed to UV (960 mJ/cm<sup>2</sup>) and then temperature shocked at -30°C or 37°C for 15 and 30 min, respectively. The mice were then sacrificed. By immunohistochemistry, expression of TRAF2, PKR, WWOX and phosphorylation at S14 or Y33, p53 and phosphorylation at S20, and Bcl-x is shown. One way ANOVA was used to analyze the statistical differences among all samples in each experimental group (n=5; \* $p$ <0.05; \*\* $p$ <0.01; \*\*\* $p$ <0.001; \*\*\*\* $p$ <0.0001).

## SUPPLEMENTAL VIDEO

**Supplementary Video 1. UV/cold shock-induced bubbling cell death (BCD) in MCF7 cells.** Breast MCF7 cells were exposed to UV irradiation (480 mJoule/cm<sup>2</sup>) and cold shock for 5 min at 4°C, and then subjected to time-lapse microscopy at RT (2 min per frame). 200x magnification. Cells were labeled with DAPI, PI and Fluo-8 (green) for imaging nuclei in blue, nuclei in red, and calcium influx in green, respectively.

**Supplementary Video 2. UV/cold shock-induced pop-out explosion death (POD) in breast MDA-MB-231 cells.** MDA-MB-231 cells were exposed to UV irradiation (480 mJoule/cm<sup>2</sup>) and cold shock for 5 min at 4°C, and then subjected to time-lapse microscopy at RT (2 min per frame). 200x magnification. Cells were labeled with DAPI, PI and Fluo-8 (green) for imaging nuclei in blue, nuclei in red, and calcium influx in green, respectively.

**Supplementary Videos 3 and 4. Time-lapse holographic microscopy of UV/cold shock-induced BCD in COS7 cells.** Experiments were carried out at 4°C in UV/cold shock-treated COS7 cells at 100x (S3) and 400x (S4) magnifications, respectively.

**Supplementary Video 5. Time-lapse holographic microscopy of UV/cold shock-induced BCD in L929S cells.** The experiment was carried out at 4°C using UV/cold shock-treated L929S cells (400x magnification).

**Supplementary Video 6. Time-lapse holographic microscopy of staurosporine-induced apoptosis in L929S cells.** The experiment was carried out at 37°C using staurosporine (2 µM)-treated L929S (400x magnification).

**Supplementary Video 7. Time-lapse holographic microscopy of UV/cold shock-treated L929S cells culturing at 37°C.** when UV/cold-shock-treated L929S cells were cultured at 37°C, apoptosis occurred and the cell bubble heights reaching ~ 15 µm (Video S7).

**Supplementary Videos 8 and 9. Time-lapse holographic microscopy of L929S cell proliferation.** Experiments were carried out at 37°C to image L929S cell division (400x magnification) in duplicates.

**Supplementary Video 10. Time-lapse fluorescent microscopy of 4T1-WWOXcfp cells: green calcium influx channel.** 4T1 breast cancer cells were transiently overexpressed with WWOXcfp full-length, treated with UV (960 mJoule/cm<sup>2</sup>), and imaged at room temperature. Cells were stained with fluo-8 for calcium influx, and DAPI and PI for nuclei. Only data for calcium influx is shown (200x magnification). A sphere and surrounding cells were imaged.

**Supplementary Video 11. Time-lapse fluorescent microscopy of 4T1-WWOXcfp cells: cfp channel.** 4T1 breast cancer cells were transiently overexpressed with WWOXcfp full-length, treated with UV (960 mJoule/cm<sup>2</sup>), and imaged at room temperature. Cells were stained with fluo-8 for calcium influx, DAPI and PI for nuclei. Only data for cfp is shown (200x magnification). A sphere and surrounding cells were imaged.

**Supplementary Video 12. Time-lapse fluorescent microscopy of 4T1-CFP cells: green calcium influx channel.** 4T1 breast cancer cells were transiently overexpressed with cfp, treated with UV (960 mJoule/cm<sup>2</sup>), and imaged at room temperature. Cells were stained with fluo-8 for calcium influx, and DAPI and PI for nuclei. Only data for calcium influx is shown (200x magnification).

**Supplementary Video 13. Time-lapse fluorescent microscopy of 4T1-CFP cells: cfp channel.** 4T1 breast cancer cells were transiently overexpressed with cfp, treated with UV (960 mJoule/cm<sup>2</sup>), and imaged at room temperature. Cells were stained with fluo-8 for calcium influx, and DAPI and PI for nuclei. Only data for cfp is shown (200x magnification).
